# Supplementary material for: Staging Parkinson's Disease Combining Motor and Nonmotor Symptoms Correlates with Disability and Quality of Life
Source: Parkinsons Dis. 2021 May 13;2021:8871549. doi: 10.1155/2021/8871549 (PMC8140853; doi:10.1155/2021/8871549)
Supplement: Supplementary Materials — Table 1 SM. Disease-related characteristics, motor and nonmotor symptoms, and autonomy for activities of daily living and quality of life in PD patients (n=603). Table 2 SM. Multiple regression model for PDQ-39SI as dependent variable. [file 8871549.f1.zip]

Archive with 2 entries (2 files):
- 8871549.f1/Table.1SM.H&Y.NMSB.docx
- 8871549.f1/Table.2.SM..doc
